# Supplementary material for: Automated cell-type classification in intact tissues by single-cell molecular profiling
Source: eLife journal article supplement (doi:10.7554/elife.30510), 2018-01-10
Supplement: supp [file elife-30510-supp-v1.zip]

Archive with 8 entries (8 files):
- elife_poa_e30510_Figure_4_figure_supplement_1.pdf
- elife_poa_e30510_Figure_1_figure_supplement_2.pdf
- elife_poa_e30510_Source_Code_File_1.zip
- elife_poa_e30510_Supplementary_File_1.docx
- elife_poa_e30510_Figure_1_figure_supplement_3.pdf
- elife_poa_e30510_Transparent_Reporting_File.docx
- elife_poa_e30510_Figure_3_figure_supplement_1.pdf
- elife_poa_e30510_Figure_1_figure_supplement_1.pdf
