# Supplementary figures and images for: Automated cell-type classification in intact tissues by single-cell molecular profiling
Source: eLife journal article supplement (doi:10.7554/elife.30510), 2018-01-10

Figure 1-figure supplement 2

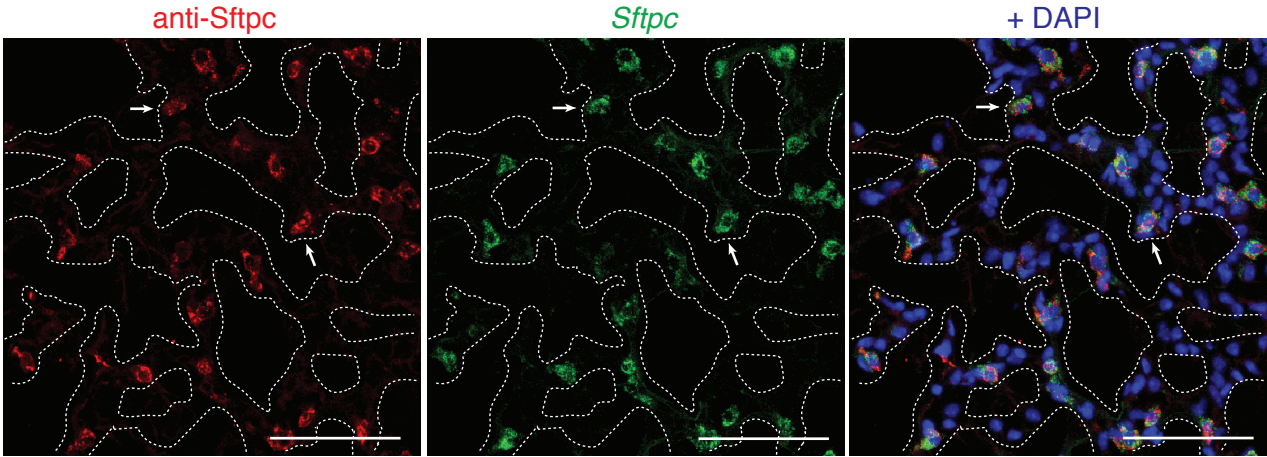

Supplement: supp [file elife-30510-supp-v1.zip]

Figure 3-figure supplement 1

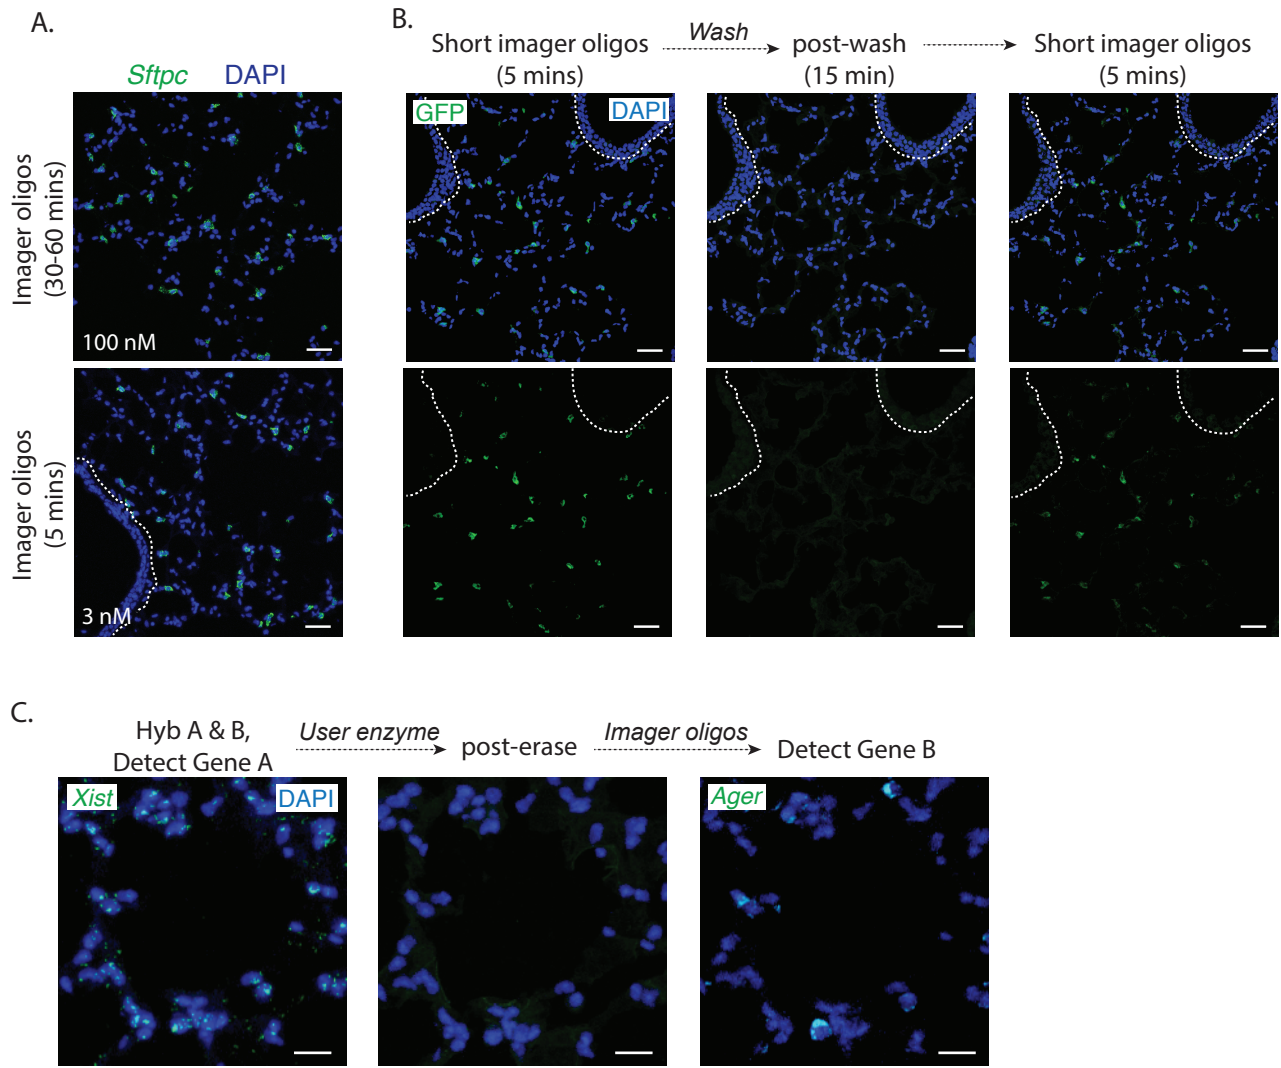

Supplement: supp [file elife-30510-supp-v1.zip]

Figure 4-figure supplement 1

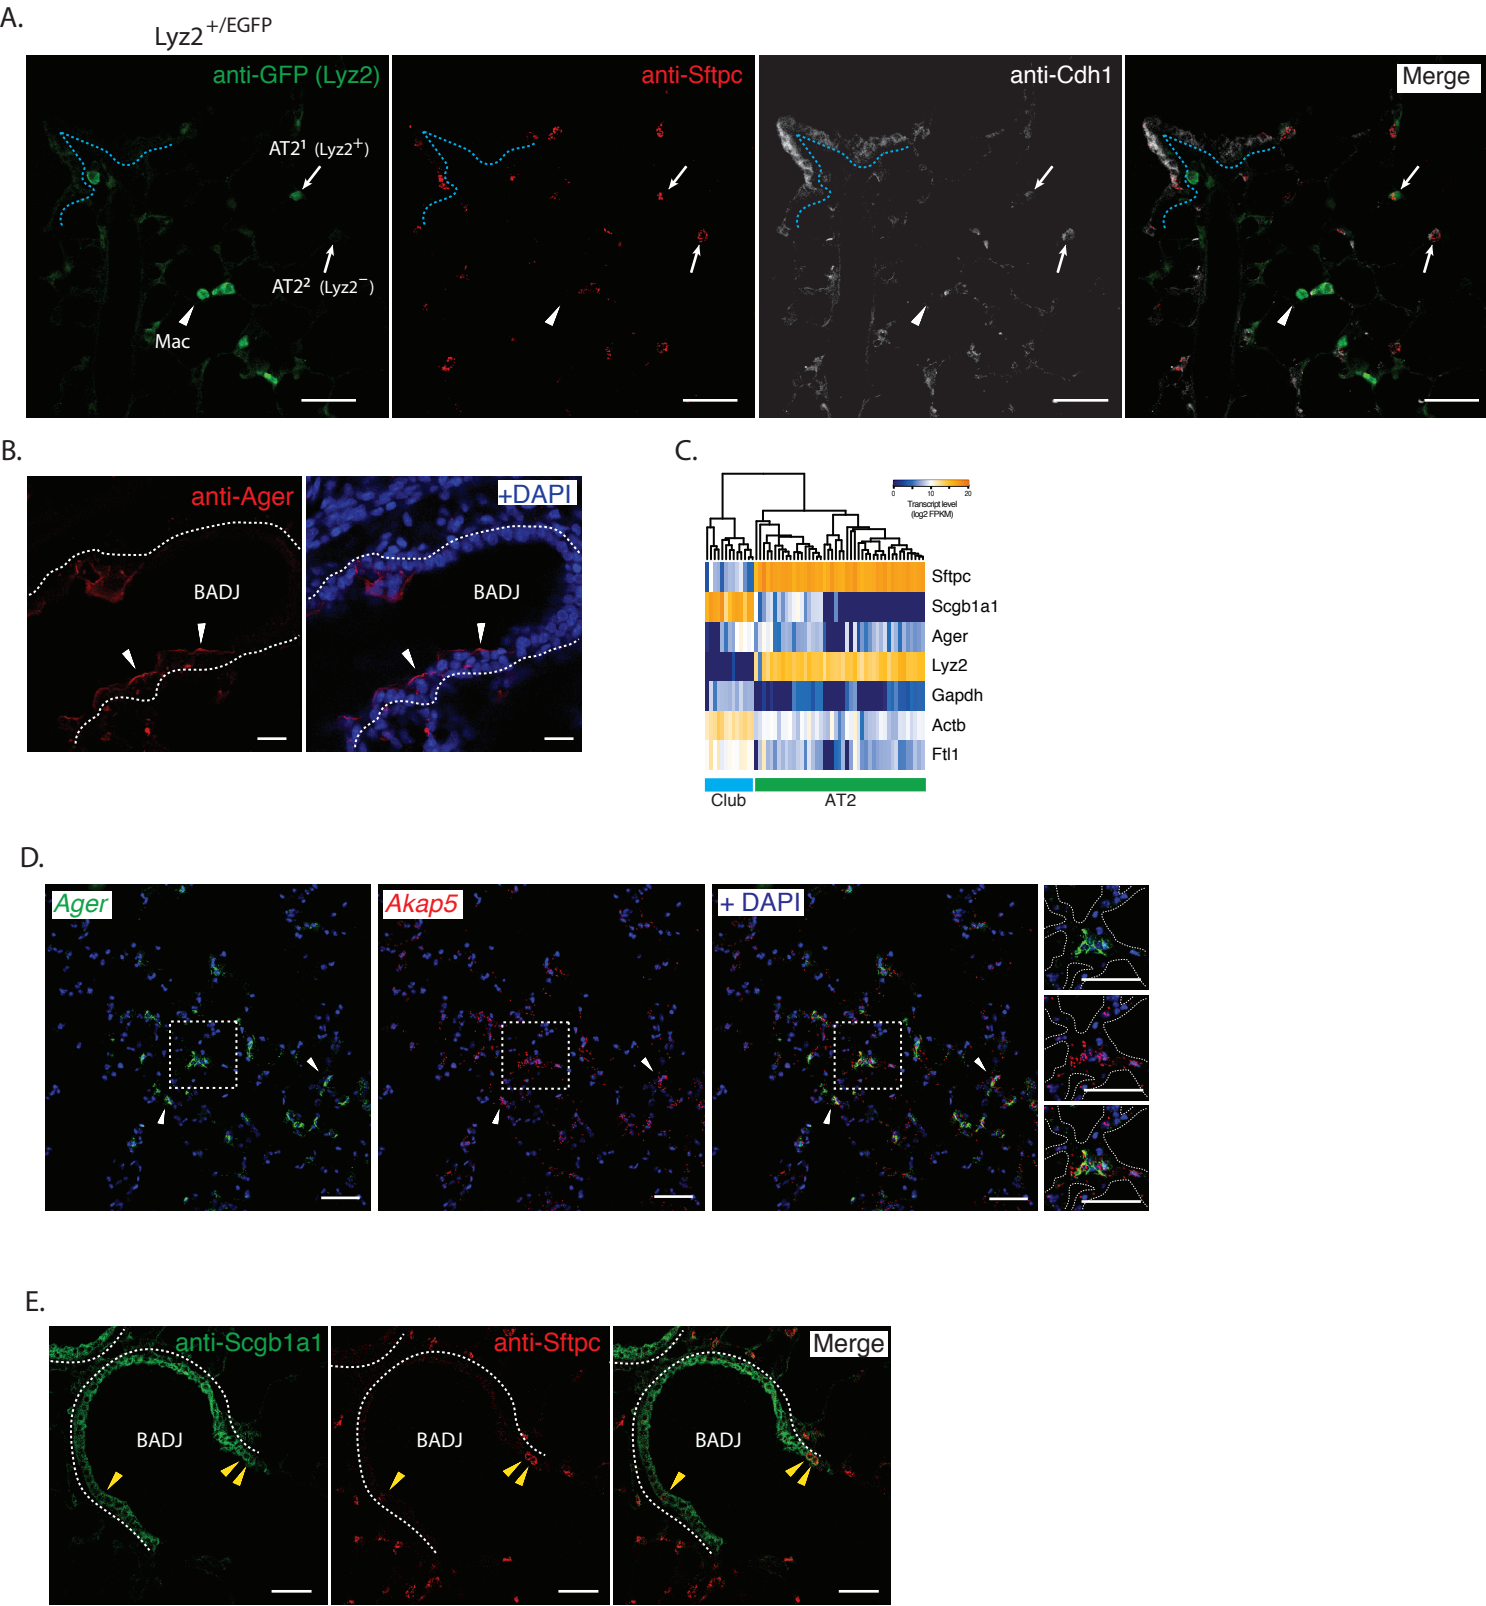

Supplement: supp [file elife-30510-supp-v1.zip › elife_poa_e30510_Figure_4_figure_supplement_1.pdf]

Figure 1-figure supplement 3

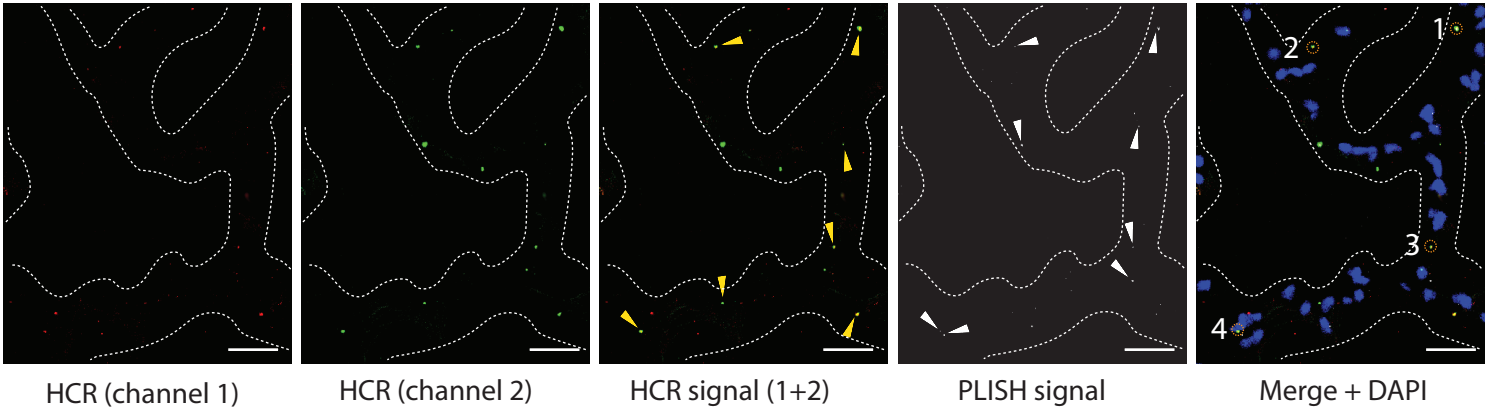

Supplement: supp [file elife-30510-supp-v1.zip › elife_poa_e30510_Figure_1_figure_supplement_3.pdf]

Figure 1-figure supplement 1

A.

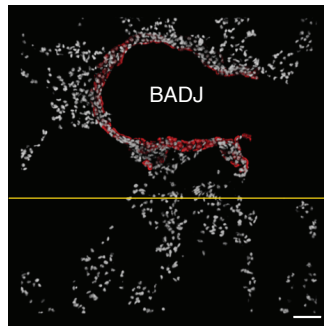

B.

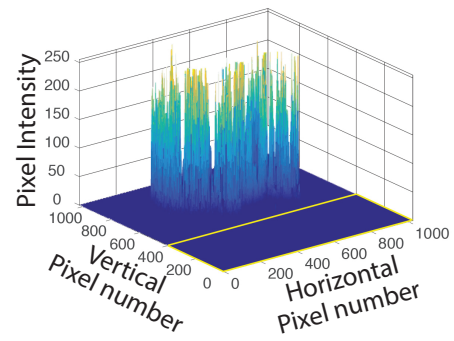

C.

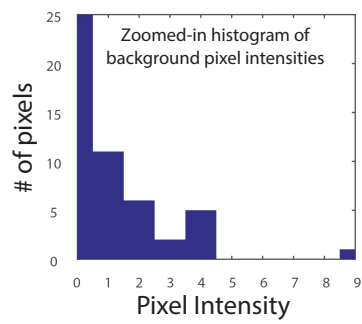

D.

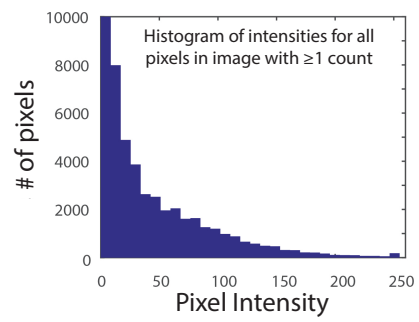

E.

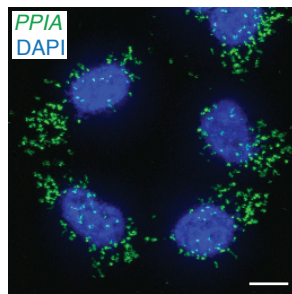

F.

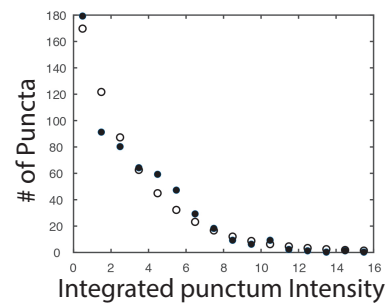

Supplement: supp [file elife-30510-supp-v1.zip › elife_poa_e30510_Figure_1_figure_supplement_1.pdf]
